# Supplementary material
Source: PubMed Central journal article supplement (PMC152680)
Supplement: cmaj_168_8_977__1.pdf [file cmaj_168_8_977__1.pdf]

## **Appendix 1. Items used to measure satisfaction with current visit**

### **Perception of patient-centred communication**

Please check the appropriate response (not at all, a little, mostly, completely) to the following questions about your perceptions of the care you received today.

- (a) To what extent was your main problem(s) discussed today?
- (b) How satisfied were you with the discussion of your problem?
- (c) To what extent did the doctor listen to what you had to say?
- (d) To what extent did the doctor explain this problem to you?
- (e) To what extent did you and the doctor discuss the role each of you would take in your care?
- (f) To what extent did the doctor explain the treatment?
- (g) To what extent did the doctor explore how manageable this (treatment) would be for you?
- (h) How well do you think your doctor understood you today?

### **Doctor's attitude**

Regarding your care today, indicate if you strongly disagree, disagree, are neutral, agree or strongly agree with the following statements.

- (a) I thought the doctor was reluctant to see me.
- (b) I think the doctor could have examined me a little more carefully.
- (c) I thought the doctor made me feel guilty about contacting him/her.
- (d) The doctor made me feel I was wasting his/her time.

(e) I think the doctor was a little rushed.

**Delay in the waiting room**

Regarding your care today, indicate if you strongly disagree, disagree, are neutral, agree or strongly agree with the following statements.

(f) I did not know how long I was going to have to wait in the office.

(g) Once arriving at the office, I would have preferred to see the doctor sooner.

(h) I was worried because the doctor took a long time to see me once I arrived at the office.
